# Supplementary material for: Features of the Human Antibody Response against the Respiratory Syncytial Virus Surface Glycoprotein G
Source: PubMed Central journal article supplement (PMC7350215; doi:10.3390/vaccines8020337), 2020-06-25
Supplement: vaccines-08-00337-s001.pdf [file vaccines-08-00337-s001.pdf]

| Serum samples taken between January and February |        |        |        |        |        |        |        |        |        |        |        |        |        |        |        |        |         |        |          |           |        |
|--------------------------------------------------|--------|--------|--------|--------|--------|--------|--------|--------|--------|--------|--------|--------|--------|--------|--------|--------|---------|--------|----------|-----------|--------|
| Pat. ID                                          | GP1    | GP2    | GP3    | GP4    | GP5    | GP6    | GP7    | GP8    | GP9    | GP10   | GP11   | GP12   | GP13   | GP14   | GP15   | GP16   | ∑ pept. | G      | G denat. | G deglyc. | F0     |
| #1                                               | 0.0693 | 0.0470 | 0.0654 | 0.0543 | 0.0901 | 0.0373 | 0.0552 | 0.1483 | 0.0499 | 0.0785 | 0.1429 | 0.2074 | 0.0683 | 0.0475 | 0.0489 | 0.0494 | 0.8703  | 0.4603 | 0.5146   | 0.5684    | 0.3426 |
| #2                                               | 0.0912 | 0.0795 | 0.0711 | 1.1472 | 0.1167 | 0.0661 | 0.1037 | 0.0636 | 0.2104 | 0.1488 | 0.1553 | 1.1201 | 0.2780 | 0.0791 | 0.0756 | 0.0746 | 3.8177  | 2.5814 | 2.4656   | 2.5788    | 0.7649 |
| #3                                               | 0.0495 | 0.0523 | 0.0423 | 0.0376 | 0.0580 | 0.0357 | 0.0604 | 0.0342 | 0.0709 | 0.1446 | 0.1298 | 0.1484 | 0.1308 | 0.0371 | 0.0409 | 0.0371 | 0.6244  | 1.7404 | 2.0315   | 2.1342    | 0.4703 |
| #4                                               | 0.0605 | 0.0575 | 0.0600 | 0.0505 | 0.0510 | 0.0476 | 0.0833 | 0.0476 | 0.0723 | 0.1298 | 0.1952 | 0.1908 | 0.0545 | 0.0530 | 0.0545 | 0.0565 | 0.6715  | 1.1130 | 1.3910   | 1.4207    | 0.4172 |
| #5                                               | 0.0598 | 0.0514 | 0.0453 | 0.0570 | 0.0710 | 0.0425 | 0.0598 | 0.0547 | 0.0822 | 0.1379 | 0.1467 | 0.2051 | 0.1150 | 0.0449 | 0.0472 | 0.0444 | 0.7580  | 1.2122 | 1.7561   | 1.7599    | 0.1486 |
| #6                                               | 0.0687 | 0.1263 | 0.1091 | 0.1077 | 0.2396 | 0.0982 | 0.1424 | 0.0930 | 0.1390 | 0.2539 | 0.1680 | 0.1832 | 0.1020 | 0.1134 | 0.1177 | 0.0973 | 2.1787  | 1.1887 | 1.4137   | 1.4094    | 0.3668 |
| #7                                               | 0.0654 | 0.0583 | 0.0752 | 0.0708 | 0.1586 | 0.0697 | 0.0888 | 0.0736 | 0.5711 | 0.3035 | 0.1842 | 0.2245 | 0.1842 | 0.0510 | 0.0616 | 0.0599 | 2.0696  | 2.7571 | 2.6516   | 2.6761    | 0.2474 |
| #8                                               | 0.1630 | 0.2245 | 0.1734 | 0.2207 | 0.2004 | 0.1954 | 0.3056 | 0.1164 | 1.6857 | 0.3184 | 0.1775 | 0.1821 | 0.1742 | 0.2282 | 0.2390 | 0.2266 | 4.8310  | 2.1014 | 2.1097   | 2.1559    | 0.3114 |
| #9                                               | 0.0668 | 0.0467 | 0.0639 | 0.0563 | 0.0553 | 0.0916 | 0.0744 | 0.0525 | 0.1049 | 0.1326 | 0.1507 | 0.1851 | 0.0525 | 0.0744 | 0.0539 | 0.0558 | 0.8806  | 0.9459 | 1.0742   | 0.7689    | 0.2027 |
| #10                                              | 0.0638 | 0.0814 | 0.0833 | 0.0610 | 0.2259 | 0.0697 | 0.1003 | 0.0970 | 2.3690 | 0.3458 | 0.1897 | 0.2127 | 0.0838 | 0.0777 | 0.0890 | 0.0824 | 4.2689  | 2.4267 | 2.4154   | 2.4093    | 0.5949 |
| #11                                              | 0.0655 | 0.0493 | 0.0549 | 0.0535 | 0.1347 | 0.0484 | 0.0789 | 0.0623 | 0.1706 | 0.2491 | 0.2020 | 0.2878 | 0.0489 | 0.1047 | 0.0498 | 0.0493 | 1.2633  | 1.5404 | 1.8227   | 1.8854    | 0.3814 |
| #12                                              | 0.1794 | 0.2423 | 0.1689 | 0.2328 | 0.1770 | 0.1312 | 0.2418 | 0.1498 | 0.3330 | 0.2991 | 0.2695 | 0.3062 | 0.2166 | 0.2886 | 0.2938 | 0.2566 | 3.7865  | 1.6829 | 1.5365   | 1.8627    | 0.7079 |

| Serum samples taken between April and May |        |        |        |        |        |        |        |        |        |        |        |        |        |        |        |        |         |        |          |        |
|-------------------------------------------|--------|--------|--------|--------|--------|--------|--------|--------|--------|--------|--------|--------|--------|--------|--------|--------|---------|--------|----------|--------|
| Pat. ID                                   | GP1    | GP2    | GP3    | GP4    | GP5    | GP6    | GP7    | GP8    | GP9    | GP10   | GP11   | GP12   | GP13   | GP14   | GP15   | GP16   | ∑ pept. | G      | G denat. | F0     |
| #1                                        | 0.0747 | 0.0519 | 0.0538 | 0.0587 | 0.0747 | 0.0398 | 0.0582 | 0.1014 | 0.0543 | 0.0883 | 0.1674 | 0.2314 | 0.0796 | 0.0480 | 0.0448 | 0.0490 | 0.8173  | 0.5467 | 0.7737   | 0.7601 |
| #2                                        | 0.0827 | 0.0642 | 0.0629 | 0.9515 | 0.0947 | 0.0568 | 0.0850 | 0.0564 | 0.1581 | 0.1544 | 0.1617 | 0.9233 | 0.2325 | 0.0749 | 0.0735 | 0.0661 | 3.0584  | 2.3795 | 2.0741   | 0.6729 |
| #3                                        | 0.0517 | 0.0441 | 0.0436 | 0.0431 | 0.0426 | 0.0345 | 0.0599 | 0.0326 | 0.0656 | 0.2060 | 0.1542 | 0.1552 | 0.1202 | 0.0393 | 0.0374 | 0.0398 | 0.7013  | 1.4534 | 1.8331   | 0.3991 |
| #4                                        | 0.0512 | 0.0516 | 0.0570 | 0.0588 | 0.0557 | 0.0431 | 0.0700 | 0.0436 | 0.0674 | 0.1338 | 0.1832 | 0.1823 | 0.0525 | 0.0498 | 0.0471 | 0.0579 | 0.6367  | 1.0530 | 1.3013   | 0.3692 |
| #5                                        | 0.0671 | 0.0537 | 0.0495 | 0.0541 | 0.0888 | 0.0453 | 0.0685 | 0.0555 | 0.0814 | 0.1948 | 0.1573 | 0.1915 | 0.1212 | 0.0495 | 0.0500 | 0.0509 | 0.9705  | 1.0986 | 1.5363   | 0.1864 |
| #6                                        | 0.1186 | 0.1294 | 0.1069 | 0.1153 | 0.1964 | 0.0961 | 0.1294 | 0.0994 | 0.1425 | 0.2428 | 0.1711 | 0.1931 | 0.1219 | 0.1472 | 0.1200 | 0.1153 | 2.2453  | 1.1179 | 1.4484   | 0.3276 |
| #7                                        | 0.0559 | 0.0539 | 0.0693 | 0.0496 | 0.1151 | 0.0549 | 0.0660 | 0.0429 | 0.5229 | 0.2085 | 0.1329 | 0.1555 | 0.1637 | 0.0650 | 0.0568 | 0.0597 | 1.4990  | 2.3493 | 2.3941   | 0.3915 |
| #8                                        | 0.1572 | 0.2600 | 0.1814 | 0.2631 | 0.2204 | 0.2436 | 0.3330 | 0.2019 | 1.7671 | 0.4563 | 0.1922 | 0.2220 | 0.2091 | 0.2677 | 0.2466 | 0.2631 | 5.4846  | 2.5075 | 2.5208   | 0.6839 |
| #9                                        | 0.0606 | 0.0757 | 0.0844 | 0.0863 | 0.0810 | 0.0660 | 0.0946 | 0.0732 | 0.1741 | 0.2095 | 0.0786 | 0.1528 | 0.0820 | 0.0965 | 0.0883 | 0.0771 | 1.5202  | 1.8772 | 1.8457   | 0.8974 |
| #10                                       | 0.0707 | 0.0604 | 0.0722 | 0.0788 | 0.1837 | 0.0578 | 0.0755 | 0.0590 | 2.2690 | 0.3078 | 0.1605 | 0.1468 | 0.0708 | 0.0718 | 0.0689 | 0.0736 | 3.6664  | 2.4267 | 2.4649   | 0.4797 |
| #11                                       | 0.0651 | 0.0541 | 0.0545 | 0.0650 | 0.1281 | 0.0536 | 0.0802 | 0.0541 | 0.3108 | 0.3483 | 0.1732 | 0.2036 | 0.0508 | 0.0560 | 0.0550 | 0.0607 | 1.3093  | 1.4066 | 1.5110   | 0.4214 |
| #12                                       | 0.1632 | 0.2349 | 0.1452 | 0.2487 | 0.1745 | 0.2145 | 0.2487 | 0.1528 | 0.3217 | 0.3331 | 0.2643 | 0.2914 | 0.1889 | 0.2733 | 0.2344 | 0.2572 | 3.7470  | 1.3686 | 1.2822   | 0.5604 |

| Serum samples taken in September |        |        |        |        |        |        |        |        |        |        |        |        |        |        |        |        |         |        |          |        |
|----------------------------------|--------|--------|--------|--------|--------|--------|--------|--------|--------|--------|--------|--------|--------|--------|--------|--------|---------|--------|----------|--------|
| Pat. ID                          | GP1    | GP2    | GP3    | GP4    | GP5    | GP6    | GP7    | GP8    | GP9    | GP10   | GP11   | GP12   | GP13   | GP14   | GP15   | GP16   | ∑ pept. | G      | G denat. | F0     |
| #1                               | 0.0652 | 0.0432 | 0.0495 | 0.0454 | 0.1111 | 0.0441 | 0.0711 | 0.3808 | 0.0738 | 0.0895 | 0.1282 | 0.1683 | 0.0882 | 0.0378 | 0.0409 | 0.0432 | 1.1563  | 0.4639 | 0.4886   | 0.7410 |
| #2                               | 0.0835 | 0.0763 | 0.0744 | 0.9158 | 0.1070 | 0.0595 | 0.0936 | 0.0638 | 0.1829 | 0.1474 | 0.1675 | 0.9034 | 0.2875 | 0.0730 | 0.0744 | 0.0797 | 3.2664  | 2.4744 | 2.2776   | 0.7421 |
| #3                               | 0.0451 | 0.0410 | 0.0423 | 0.0400 | 0.0548 | 0.0391 | 0.0562 | 0.0350 | 0.0589 | 0.1721 | 0.1197 | 0.1269 | 0.1082 | 0.0414 | 0.0433 | 0.0396 | 0.5269  | 1.3380 | 1.6938   | 0.3848 |
| #4                               | 0.0520 | 0.0428 | 0.0483 | 0.0437 | 0.0437 | 0.0456 | 0.0672 | 0.0474 | 0.0704 | 0.1155 | 0.1721 | 0.1454 | 0.0479 | 0.0446 | 0.0456 | 0.0469 | 0.5717  | 0.9353 | 1.1153   | 0.3300 |
| #5                               | 0.0639 | 0.0455 | 0.0469 | 0.0432 | 0.1209 | 0.0418 | 0.0704 | 0.0474 | 0.0669 | 0.2304 | 0.1223 | 0.1568 | 0.1494 | 0.0432 | 0.0478 | 0.0428 | 0.9371  | 1.4020 | 1.2801   | 0.2165 |
| #6                               | 0.1171 | 0.1318 | 0.1147 | 0.1294 | 0.2721 | 0.1124 | 0.1697 | 0.1062 | 0.1384 | 0.2816 | 0.1427 | 0.1446 | 0.1237 | 0.1536 | 0.1446 | 0.1275 | 2.4101  | 1.1505 | 1.1230   | 0.3755 |
| #7                               | 0.0609 | 0.0550 | 0.0656 | 0.0634 | 0.0968 | 0.0560 | 0.0663 | 0.0481 | 0.5119 | 0.2270 | 0.2004 | 0.1498 | 0.1553 | 0.0703 | 0.0604 | 0.0526 | 1.5476  | 2.4747 | 2.4963   | 0.4446 |
| #8                               | 0.2234 | 0.2669 | 0.2689 | 0.3108 | 0.2784 | 0.2914 | 0.4298 | 0.2199 | 1.5698 | 0.4404 | 0.1859 | 0.2299 | 0.2559 | 0.3814 | 0.3409 | 0.3389 | 6.0027  | 2.4078 | 2.1659   | 0.7498 |
| #9                               | 0.0788 | 0.0829 | 0.0929 | 0.0743 | 0.0734 | 0.0689 | 0.0906 | 0.0657 | 0.2129 | 0.2949 | 0.1332 | 0.1395 | 0.0684 | 0.0647 | 0.0802 | 0.0861 | 1.7274  | 1.6517 | 1.9530   | 0.9998 |
| #10                              | 0.0702 | 0.0735 | 0.0778 | 0.0654 | 0.2158 | 0.0673 | 0.1008 | 0.0545 | 2.2515 | 0.3485 | 0.2177 | 0.1714 | 0.0616 | 0.0764 | 0.0726 | 0.0778 | 3.8869  | 2.3961 | 2.4902   | 0.5056 |
| #11                              | 0.0707 | 0.0599 | 0.0653 | 0.0658 | 0.1504 | 0.0554 | 0.0901 | 0.0513 | 0.2846 | 0.4152 | 0.1919 | 0.1522 | 0.0576 | 0.0662 | 0.0716 | 0.0712 | 1.6951  | 1.8080 | 1.8037   | 0.4553 |
| #12                              | 0.1696 | 0.2409 | 0.1274 | 0.2179 | 0.1777 | 0.2280 | 0.2788 | 0.1677 | 0.3396 | 0.3727 | 0.2643 | 0.2797 | 0.2007 | 0.3081 | 0.2524 | 0.2764 | 3.8900  | 1.4366 | 1.4921   | 0.6098 |

| Serum samples taken between January and February (the following year) |        |        |        |        |        |        |        |        |        |        |        |        |        |        |        |        |         |        |          |        |
|-----------------------------------------------------------------------|--------|--------|--------|--------|--------|--------|--------|--------|--------|--------|--------|--------|--------|--------|--------|--------|---------|--------|----------|--------|
| Pat. ID                                                               | GP1    | GP2    | GP3    | GP4    | GP5    | GP6    | GP7    | GP8    | GP9    | GP10   | GP11   | GP12   | GP13   | GP14   | GP15   | GP16   | ∑ pept. | G      | G denat. | F0     |
| #1                                                                    | 0.0716 | 0.0628 | 0.0697 | 0.0653 | 0.0930 | 0.0429 | 0.0604 | 0.1340 | 0.0531 | 0.1057 | 0.1384 | 0.2051 | 0.0872 | 0.0453 | 0.0477 | 0.0477 | 0.9870  | 0.5052 | 0.6820   | 0.7887 |
| #2                                                                    | 0.0921 | 0.0639 | 0.0558 | 0.9373 | 0.0944 | 0.0563 | 0.0754 | 0.1517 | 0.1579 | 0.1293 | 0.1879 | 0.7871 | 0.2414 | 0.0701 | 0.0758 | 0.0649 | 2.9704  | 2.4118 | 2.2038   | 0.6120 |
| #3                                                                    | 0.0530 | 0.0467 | 0.0458 | 0.0592 | 0.0418 | 0.0369 | 0.0565 | 0.0369 | 0.0588 | 0.1656 | 0.1304 | 0.1367 | 0.0975 | 0.0418 | 0.0383 | 0.0387 | 0.5301  | 1.2766 | 1.5962   | 0.3138 |
| #4                                                                    | 0.0484 | 0.0488 | 0.0426 | 0.0448 | 0.0448 | 0.0466 | 0.0663 | 0.0412 | 0.0587 | 0.1031 | 0.1344 | 0.1425 | 0.0511 | 0.0444 | 0.0453 | 0.0493 | 0.4464  | 0.8031 | 0.9470   | 0.1873 |
| #5                                                                    | 0.0454 | 0.0460 | 0.0432 | 0.0446 | 0.0706 | 0.0381 | 0.0595 | 0.0446 | 0.0664 | 0.1477 | 0.1291 | 0.1231 | 0.0873 | 0.0409 | 0.0437 | 0.0441 | 0.6243  | 0.9387 | 1.4208   | 0.1510 |
| #6                                                                    | 0.1345 | 0.1586 | 0.1255 | 0.1435 | 0.2302 | 0.1302 | 0.1705 | 0.1094 | 0.1359 | 0.2818 | 0.1530 | 0.1695 | 0.1307 | 0.1705 | 0.1421 | 0.1402 | 2.5260  | 1.0305 | 0.9760   | 0.3405 |
| #7                                                                    | 0.0455 | 0.0418 | 0.0438 | 0.0434 | 0.0649 | 0.0393 | 0.0562 | 0.0393 | 0.4308 | 0.3229 | 0.1732 | 0.1133 | 0.1220 | 0.0451 | 0.0434 | 0.0401 | 1.1623  | 2.0508 | 2.0620   | 0.3852 |
| #8                                                                    | 0.1990 | 0.2989 | 0.1990 | 0.2893 | 0.2228 | 0.2852 | 0.3250 | 0.2237 | 1.4047 | 0.4323 | 0.1618 | 0.2223 | 0.2081 | 0.3296 | 0.2856 | 0.2925 | 5.3799  | 2.0928 | 2.1579   | 0.6440 |
| #9                                                                    | 0.0556 | 0.0616 | 0.0769 | 0.0732 | 0.0579 | 0.0546 | 0.0658 | 0.0685 | 0.2802 | 0.2871 | 0.1519 | 0.1417 | 0.0611 | 0.0647 | 0.0593 | 0.0666 | 1.3165  | 1.8819 | 1.3776   | 0.9947 |
| #10                                                                   | 0.0599 | 0.0582 | 0.0573 | 0.0591 | 0.0976 | 0.0503 | 0.0766 | 0.0512 | 1.9910 | 0.2323 | 0.1824 | 0.1522 | 0.0525 | 0.0525 | 0.0525 | 0.0612 | 2.7921  | 2.1581 | 2.2789   | 0.4458 |
| #11                                                                   | 0.0685 | 0.0568 | 0.0543 | 0.0638 | 0.1288 | 0.0508 | 0.0783 | 0.0536 | 0.2283 | 0.2865 | 0.2096 | 0.2418 | 0.0531 | 0.0517 | 0.0498 | 0.0568 | 1.2416  | 1.2723 | 1.4875   | 0.3052 |
| #12                                                                   | 0.2243 | 0.2511 | 0.1644 | 0.2276 | 0.1984 | 0.1856 | 0.2931 | 0.1753 | 0.3901 | 0.3095 | 0.2615 | 0.3185 | 0.2247 | 0.2379 | 0.2393 | 0.3072 | 4.0085  | 1.3086 | 1.3201   | 0.6408 |

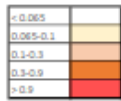

**a**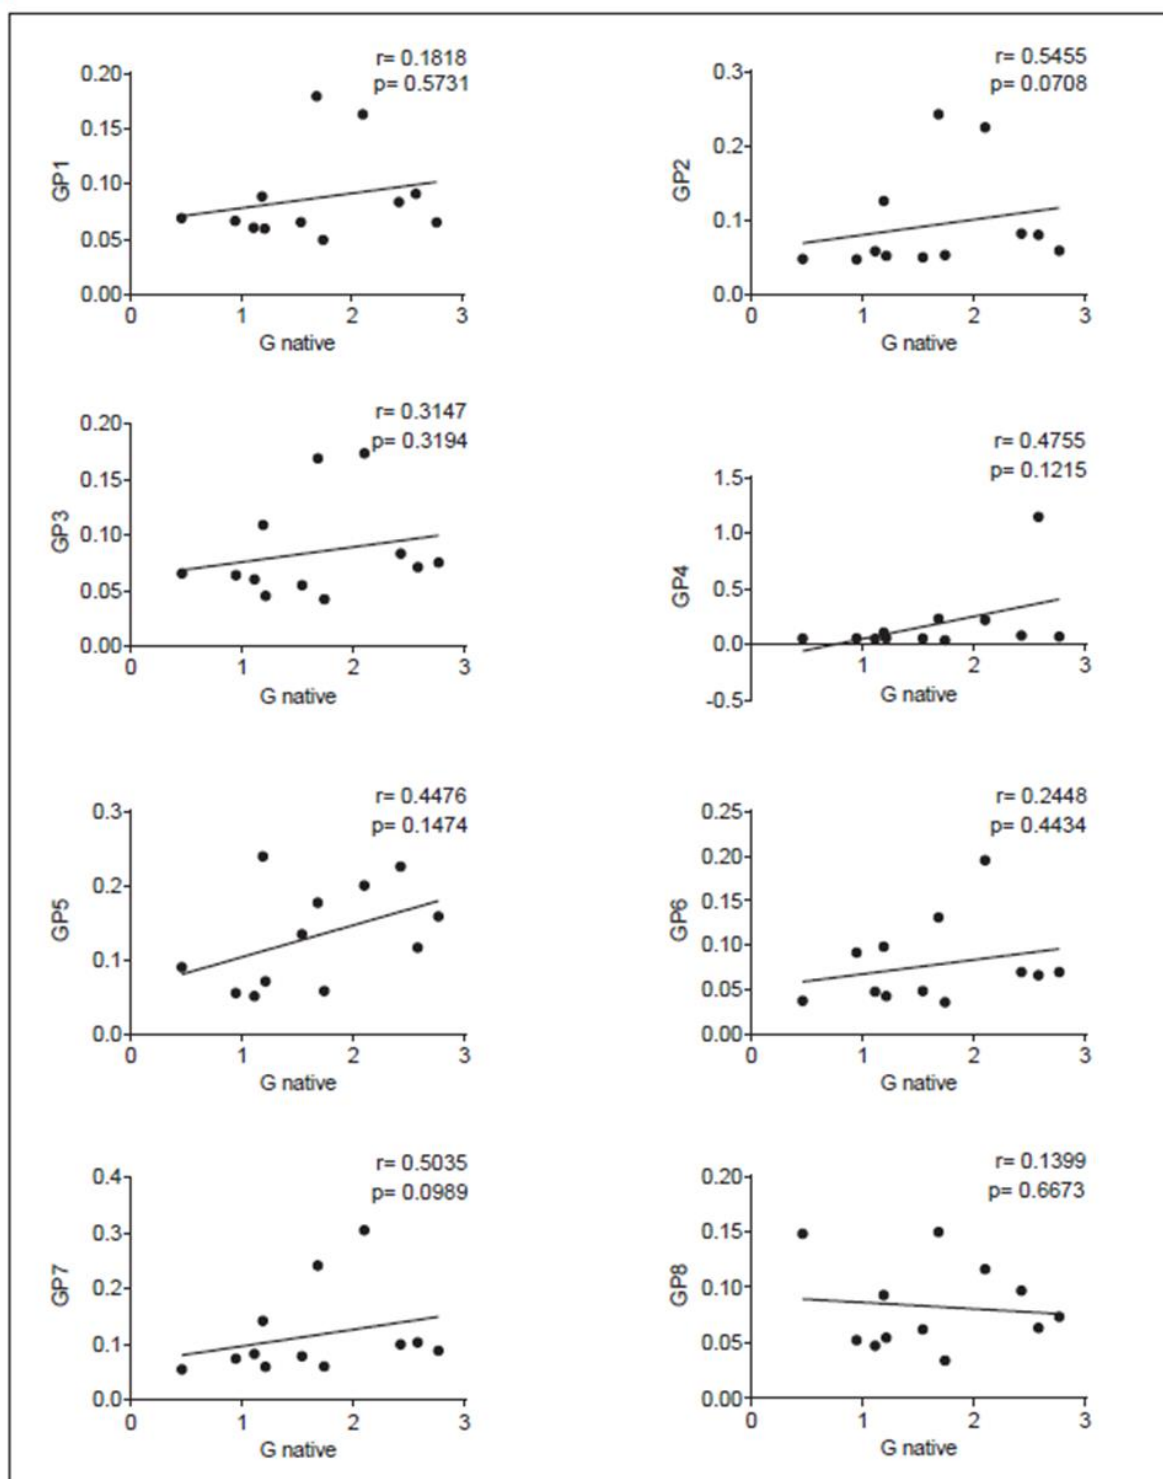

**b**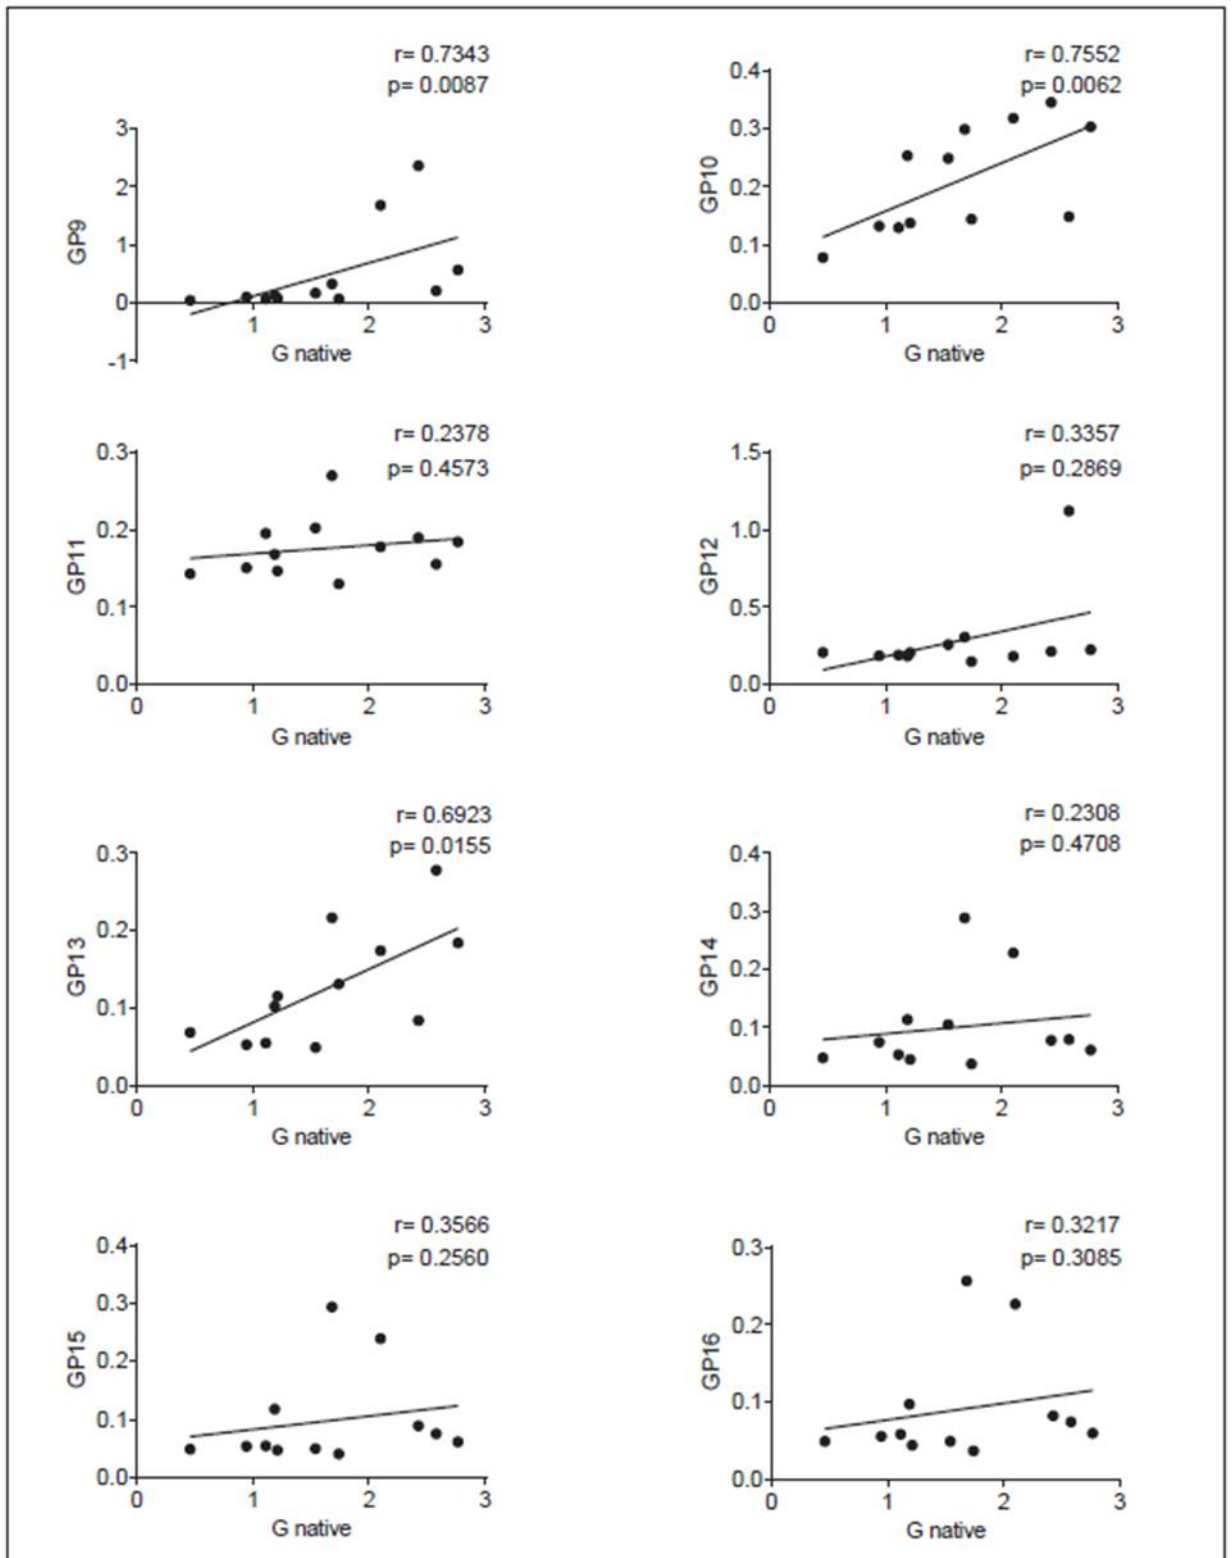

**Figure S2.** Correlations of IgG levels specific for native G (x-axes) and G-derived peptides GP1–GP8 (a) and G-derived peptides GP9–GP16. (b) measured in sera from 12 adult individuals in individual scatter plots with Spearman correlation coefficient  $r$  and  $p$  values.

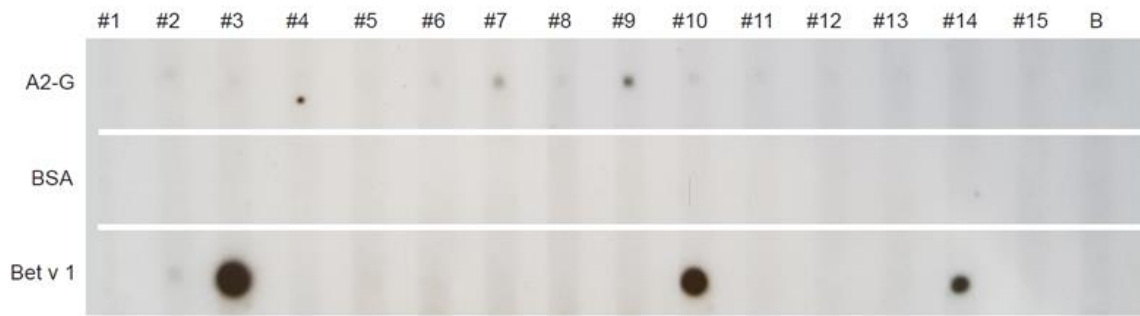

**Figure S3.** IgE reactivity to nitrocellulose-dotted G protein and major birch pollen allergen, Bet v 1. Sera from 15 adult subjects (1–15) and buffer (B) without serum were tested for IgE reactivity to nitrocellulose-dotted A2-G (upper panel), BSA (middle panel) or recombinant major birch pollen allergen, rBet v 1 (lower panel). Bound IgE was detected with  $^{125}\text{I}$ -labeled anti-human IgE and visualized by autoradiography.
